# Supplementary material for: Predicting Modifiers of Genotype-Phenotype Correlations in Craniofacial Development
Source: MDPI journal article supplement (doi:10.3390/ijms24021222), 2023-01-08
Supplement: s1 [file s1]

| Chemical                    | CAS Registry Number |
|-----------------------------|---------------------|
| Dihydroergocristine         | 24730-10-7          |
| Piribedil                   | 3605-01-4           |
| Zalcitabine                 | 7481-89-2           |
| Pyrrolidine dithiocarbamate | 25769-03-3          |
| PCO-400                     | 121055-10-5         |
| Omeprazole                  | 73590-58-6          |
| Venlafaxine                 | 93413-69-5          |
| Trimipramine                | 739-71-9            |
| Formestane                  | 566-48-3            |
| Salubrial                   | 405060-95-9         |

**Supplementary Table S1.** Randomly selected chemicals from the LINCS output that were tested.

| Gene           | Purpose              | Forward (5' -> 3')        | Reverse (5' -> 3')             |
|----------------|----------------------|---------------------------|--------------------------------|
| <i>gata3</i>   | RFLP                 | GGAAACAGAAGGGGATGGGG      | TCTTACTAGAGAAGTGTAAGACAGCTAGGG |
| <i>rpl8</i>    | qPCR<br>housekeeping | GGCTTATGCACCGTAAAG        | TCCTCCGCCGGCCTCCCC             |
| <i>sfrp1a</i>  | qPCR                 | CCTACAAAAGATGATAAGCTCCGG  | CAAGCAATATTGAACAACGCAAGG       |
| <i>gpc1a</i>   | qPCR                 | ATCGGCGATATAAACAGAGAAACG  | GCTGATTACTCTTGTTGGTGTGGT       |
| <i>wnt7b</i>   | qPCR                 | TTATGGCATAGTCGTCCGCGGAG   | CACTCTGGTAACGCTTATGGTCC        |
| <i>nkd1</i>    | qPCR                 | ATAGCACATTCATCGCATCCGGGTA | TGCGCTCTATTTGACGATCCTTTGG      |
| <i>nkd2a</i>   | qPCR                 | ATTAAAGCGACTGCACTACTGT    | AAGGTCCGTCACGCAGACGACG         |
| <i>col2a1a</i> | qPCR                 | TCAACCTGTACGGGAACCTTC     | TATATCGTTCTCGGACGGAGA          |
| <i>cnmd</i>    | qPCR                 | GATAACTACAGTGCCGCTTACAGC  | CCCTCTGTCGTCGCCGACGTCTGT       |
| <i>ccl25b</i>  | qPCR                 | AATATAGCCTTATTGTGATTCCAC  | CCTATTGAGGCATTGACTGATGCG       |
| <i>col9a3</i>  | qPCR                 | GAAAGAGATCTGAAATGAACTGGT  | CTATGTGACAGAACTGTGCAAGT        |
| <i>ppp3r2</i>  | qPCR                 | ACCTAATCTCGTTAGTGTAGGTT   | CTGACCGATACGTGCTTCGTTGA        |

**Supplementary Table S2.** Primers used for genotyping and qPCR experiments.

| Chemical                        | Percentage with disrupted trabeculae |
|---------------------------------|--------------------------------------|
| Predicted phenotype enhancers   |                                      |
| Flubendazole                    | 4.65%                                |
| Rigosertib                      | 6.41%                                |
| Etacrynic acid                  | 8.33%                                |
| Clofibric acid                  | 8.45%                                |
| Nocodazole                      | 3.75%                                |
| Vinorelbine                     | 7.84%                                |
| Vinblastine                     | 7.69%                                |
| Vincristine                     | 9.89%                                |
| Predicted phenotype suppressors |                                      |
| PD-184352                       | 2.56%                                |
| Triptolide                      | 5.88%                                |
| Belinostat                      | 0.43%                                |
| BMS-191011                      | 3.71%                                |
| ISOX                            | 6.73%                                |
| Daunorubicin                    | 4.56%                                |
| Chromanol                       | 6.98%                                |
| Alvocidib                       | 5.78%                                |

**Supplementary Table S3.** Percentage of wild-type embryos with disrupted (non-intact) trabeculae when exposed to predicted phenotype modifiers. The concentration used for each chemical is lowest observed adverse effect level (see Supplementary Figure S3).

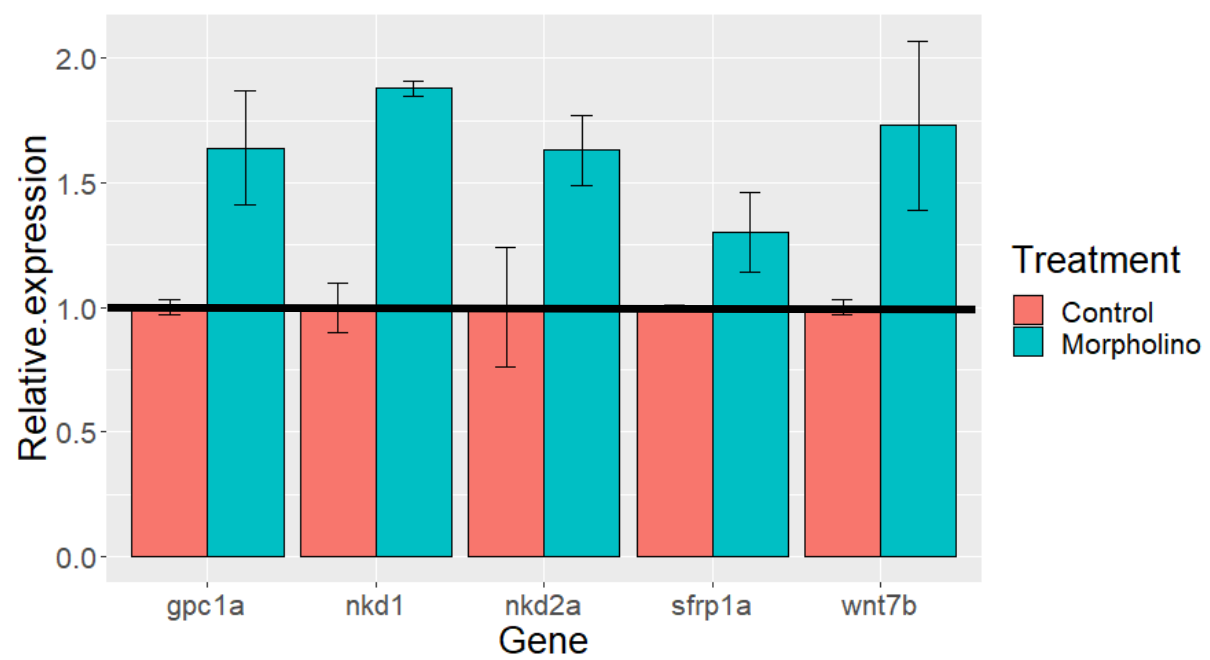

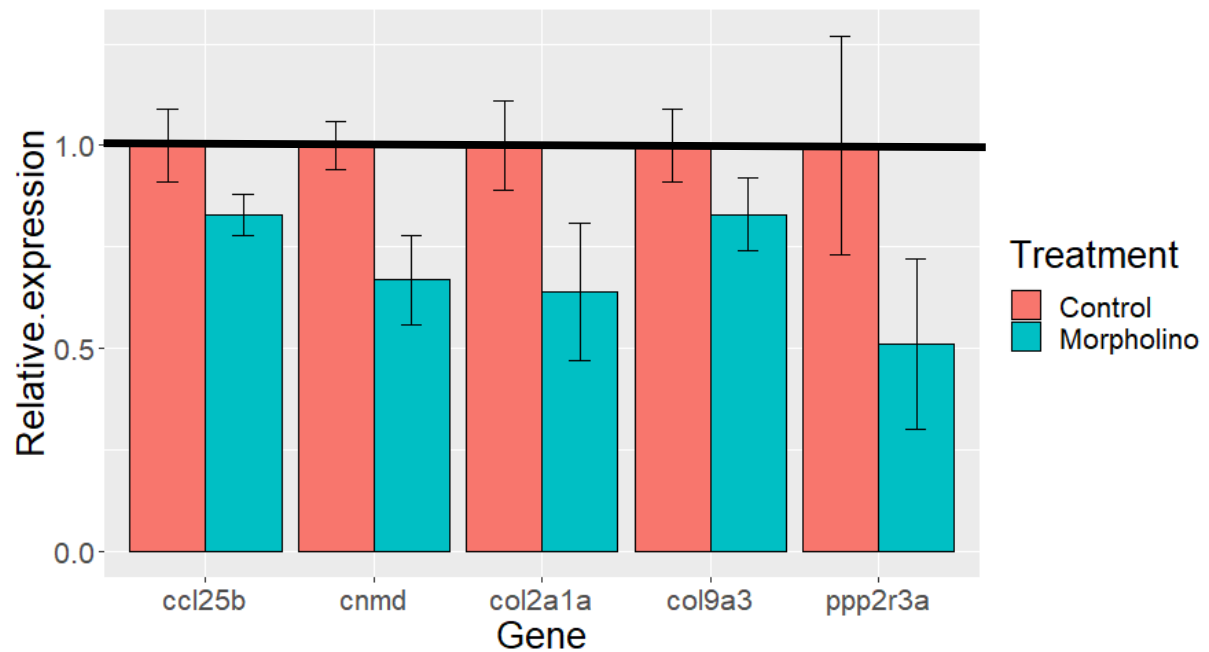

**Supplementary Figure S1.** qPCR validation of the five most up- and down-regulated genes from the RNA-seq dataset. Nine out of ten genes saw demonstrated significantly differential expression in the direction that was predicted from the RNA-seq data. Expression has been normalized relative to control samples.

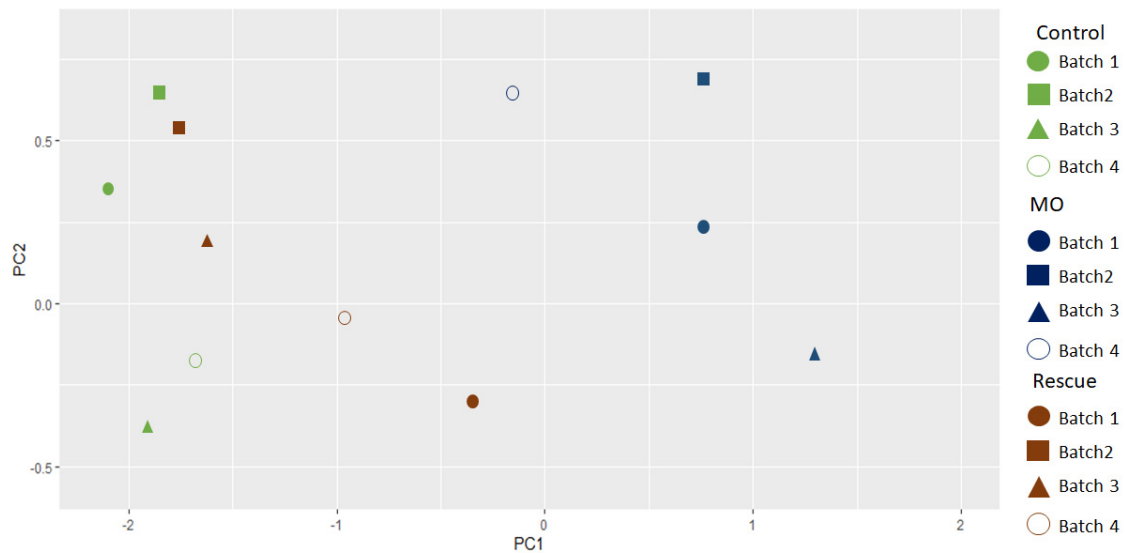

**Supplemental Figure S2.** Principal components analysis (PCA) of the RNA-seq samples. Principal component 1 (PC1) explains 35% of the transcriptional variance across datasets, and PC2 explains 17%. PC1 largely captured the difference between wild-type (and wild-type-like) phenotypes and mutant-like phenotypes.

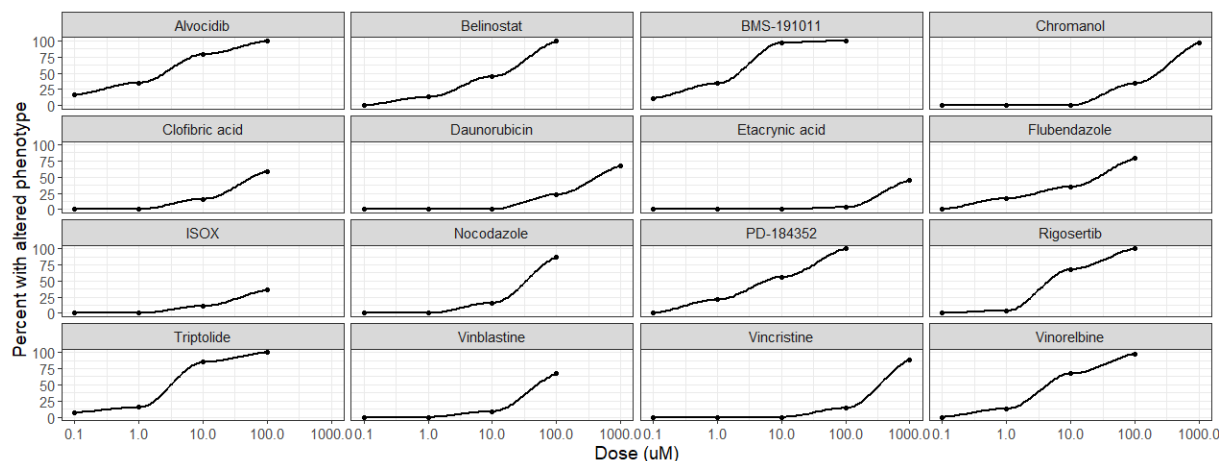

**Supplemental Figure S3.** A dose response curve (0.1 uM, 1 uM, 10 uM, 100 uM) in wild-type embryos was used to determine the lowest observed adverse effect level (LOAEL) that elicited a craniofacial defect.

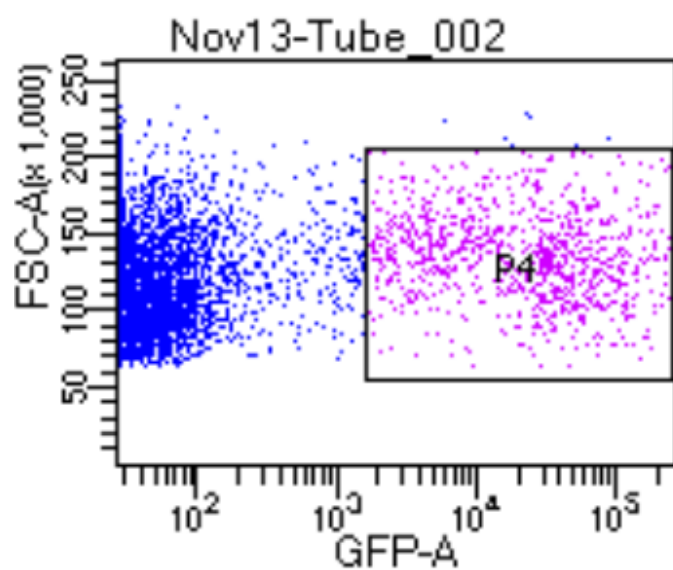

**Supplemental Figure S4.** Gating strategy to specifically collect *fli1*:EGFP positive cells. Separate sorts were done to determine the fluorescence of *hsp70l*:GATA3-EGFP and *fli1*:eGFP cells. The cells captured in the labeled box “P4” were specific to *fli1*:eGFP and this gate was used to separate that subset of GFP-positive cells in all subsequent sorts.
