# Supplementary material for: Predicting Modifiers of Genotype-Phenotype Correlations in Craniofacial Development
Source: Int J Mol Sci. 2023 Jan 8;24(2):1222. doi: 10.3390/ijms24021222 (PMC9864425; doi:10.3390/ijms24021222)
Supplement: Supplementary file 1 [file ijms-24-01222-s001.zip › AllGenes_Final.csv]

Gene	Log2FC	padj
col2a1a	-2.967135883	4.37E-63
cnmd	-2.494441337	2.27E-79
ccl25b	-2.298013149	7.91E-21
col9a3	-2.268094076	9.64E-54
ppp3r2	-2.251538767	6.55E-07
matn4	-2.220768243	3.34E-79
col9a1a	-2.206334532	2.16E-59
col9a2	-2.067765009	5.97E-52
col11a1a	-2.045995463	3.14E-48
cthrc1a	-1.9610583	2.45E-63
camk2a	-1.888968688	7.69E-34
prkcb	-1.836501268	2.33E-40
wnt2b	-1.785875195	2.85E-36
wnt1	-1.64385619	4.10E-07
mapk10	-1.59946207	7.25E-33
fibina	-1.575677295	6.79E-34
wnt10b	-1.473931188	3.97E-13
prkacb	-1.395928676	7.90E-39
wnt5b	-1.358453971	1.70E-47
col11a2	-1.266391582	3.26E-29
wnt9a	-1.251538767	3.78E-14
serpinh1b	-1.241868072	2.27E-26
cd82a	-1.234611629	6.66E-17
col2a1b	-1.186494299	1.97E-45
cyp26c1	-1.157829685	1.26E-14
tnn	-1.111581293	4.42E-11
zgc:162730	-1.104701534	3.32E-18
wfdc2	-1.095968988	7.26E-23
tgfbi	-1.079522546	2.30E-37
mmp2	-1.053335761	4.94E-80
ctgfa	-1.051125711	2.25E-08
sparc	-1.042506486	1.38E-41
postnb	-1.041046126	8.55E-30
cxcl12a	-1.04104429	6.90E-13
btg2	-1.033820919	3.21E-28
socs3a	-1.029489058	2.59E-23
fxyd1	-1.019555352	2.79E-14
foxp4	-1.010247469	4.55E-73
snai1a	-1.004598275	2.81E-19
si:ch73-335l21.4	-0.995493985	1.86E-06
col5a1	-0.97663945	4.16E-32
prrx1a	-0.973937133	2.35E-24
junba	-0.97296818	7.79E-28
fgfbp2b	-0.965970223	2.45E-14
ppib	-0.963829151	1.95E-14
ier2a	-0.957655742	4.66E-30
otos	-0.952812316	2.58E-15
prss35	-0.946995534	1.07E-13
cpn1.1	-0.944296449	1.56E-19
fstl1b	-0.903734684	5.36E-13
fkbp14	-0.900266493	3.28E-14
sfrp5	-0.8889687	2.93E-04
LO018188.1	-0.889504751	3.49E-24
col1a2	-0.889363517	3.50E-10
fosab	-0.883008433	1.73E-80
ackr3b	-0.881086867	5.96E-57
fkbp9	-0.870589728	5.88E-32
ssr4	-0.866465711	8.02E-99
pcolcea	-0.86625016	1.30E-28
ebf3a	-0.862910099	6.23E-21
loxl2b	-0.858524759	3.55E-30
rnd3b	-0.856753182	9.89E-25
ssr2	-0.840062362	3.36E-79
foxf2a	-0.839460656	2.26E-28
col11a1b	-0.835398414	7.01E-32
ccdc3b	-0.829057905	1.37E-22
aspn	-0.826606549	2.65E-12
snai2	0.808358683	1.07E-39
epyc	-0.804283725	7.68E-09
crabp2a	-0.801409164	1.01E-12
zgc:92066	-0.801335823	4.92E-11
col1a1a	-0.792223124	7.99E-06
ms4a17a.8	-0.784551552	6.97E-10
si:ch211-251b21.1	-0.771192575	8.19E-06
rcn3	-0.768988754	1.03E-25
tnc	-0.765405169	1.62E-16
bambia	-0.760408793	9.26E-18
zgc:153675	-0.758820877	7.88E-25
ier5l	-0.758011336	1.02E-66
col1a1b	-0.751807246	0.031769333
eya1	-0.751235768	3.70E-14
jdp2b	-0.745352584	2.67E-05
eva1a	-0.743643943	2.62E-58
lum	-0.742123987	5.15E-13
foxc1a	-0.738560829	2.79E-75
six2a	-0.732276129	1.96E-18
rarga	-0.711409274	6.42E-84
fkbp11	-0.707806917	4.02E-18
fkbp7	-0.704212378	1.08E-21
hmx4	-0.703643354	0.026504875
foxd2	-0.702918764	1.89E-38
asph	-0.698707661	3.82E-20
flot1b	-0.697892752	1.24E-63
rrbp1b	-0.691829606	1.50E-19
cd63	-0.691728702	7.87E-29
prrx1b	-0.688830271	0.301080698
papss2b	-0.6881554	8.58E-19
ppdpfb	-0.687860306	9.54E-27
ostc	-0.683881134	9.19E-63
serp1	-0.681804931	5.18E-16
cdh11	-0.676397578	1.97E-19
calr	-0.676071425	1.42E-69
selenop	-0.675974936	1.74E-21
jun	-0.671873549	3.00E-19
zgc:158343	-0.66905342	3.63E-06
tmem258	-0.665344938	6.95E-57
cyr61	-0.657944186	5.78E-39
atoh8	-0.650736791	8.06E-17
rcn1	-0.650005612	1.43E-52
sec61g	-0.648018379	2.04E-43
ugdh	-0.641147525	4.23E-83
hey1	-0.638921167	2.34E-46
ier2b	-0.637156679	1.06E-11
slc35d1a	-0.633354873	5.91E-07
krt18	-0.632500658	5.42E-12
tbx1	-0.631924298	1.74E-19
myl9b	-0.629196713	1.64E-10
tfpia	-0.628830611	9.69E-12
xbp1	-0.622431436	3.58E-25
tpm1	-0.620383009	1.85E-10
nog3	-0.6186299	8.78E-05
plod3	-0.611648907	1.08E-11
cope	-0.606119539	2.81E-37
fkbp10b	-0.605342085	1.86E-19
atf2	-0.603659734	0.000315281
f3b	-0.599019055	3.32E-07
spcs1	-0.594443123	7.49E-68
kdelr2b	-0.589987635	1.55E-08
mycb	-0.58620914	1.11E-08
calua	-0.584383573	2.86E-17
tmem176	-0.580105229	1.02E-81
yif1a	-0.579810703	1.65E-64
sdc4	-0.57352261	3.45E-15
pim3	-0.568986727	3.06E-06
crtap	-0.567544756	3.53E-13
tbx15	-0.564691965	9.19E-16
crabp2b	-0.55874404	1.49E-87
col12a1a	-0.558579583	3.44E-08
mfap2	-0.557705026	2.22E-20
ckap4	-0.55629561	3.96E-11
h1f0	-0.555741547	5.30E-05
cxcl18b	-0.553903539	1.31E-08
igf2b	-0.553187227	7.85E-12
srpx	-0.550327376	5.37E-18
ca6	-0.548873175	0.000204704
si:ch1073-459j12.1	-0.540506219	2.77E-11
id3	-0.536509761	1.35E-05
raraa	-0.533576708	6.24E-10
CR383676.1	-0.522199197	2.48E-44
lasp1	-0.520984358	4.67E-43
p3h1	-0.519270372	4.29E-09
thbs1b	-0.517462878	4.92E-08
marcksl1b	-0.517102225	2.75E-07
ier3ip1	-0.51415266	1.50E-30
plod1a	-0.510754881	3.36E-15
socs3b	-0.50795022	0.000691214
ssr3	-0.505320233	1.24E-11
lman1	-0.504008908	5.85E-13
p4ha1b	-0.49847018	1.36E-08
myl9a	-0.496967626	7.06E-16
si:ch211-133n4.4	-0.491156342	5.69E-14
selenom	-0.485872683	5.07E-10
angptl1a	-0.482588749	2.24E-09
sox6	-0.479350507	2.17E-05
ebf2	-0.47138572	2.17E-06
tram2	-0.469458681	2.63E-10
sost	-0.469309852	5.92E-15
nucb2a	-0.464822053	2.26E-11
id2a	-0.463482203	0.03950837
zgc:77650	-0.461536962	7.39E-11
zfp36l2	-0.453181245	0.004666872
zgc:77517	-0.449959674	0.001212802
lrrc17	-0.44575268	0.001574548
mcl1a	-0.445020302	1.61E-05
cnn2	-0.443000119	0.207442106
p4hb	-0.439156664	0.020507891
sec61b	-0.43876031	1.92E-11
p4ha2	-0.437928539	7.14E-12
egr1	-0.437579973	0.000134201
lrrc59	-0.435628344	0.001739669
s1pr1	-0.431691936	0.013167659
cox4i2	-0.425918232	1.60E-12
mex3b	-0.424878081	4.17E-05
dcn	-0.418300402	0.459026737
kdelr2a	-0.416708828	2.42E-05
bhmt	-0.416041647	7.27E-09
junbb	-0.415022719	0.000516606
eva1ba	-0.411948287	0.017685474
six1a	-0.410754355	0.00026003
fam198a	-0.407591455	4.53E-13
hpgd	-0.406120544	0.000521217
alx4a	-0.405925066	3.44E-06
olfml3b	-0.405070948	3.43E-11
hdlbpa	-0.404812417	1.26E-06
pknox2	-0.404061111	1.30E-08
histh1l	-0.402528612	0.0000112
plpp3	-0.402526462	0.522837911
tob1a	-0.400905382	0.000980421
serpine1	-0.400693635	0.000116297
pdcd6	-0.396876972	0.890930313
AL929222.2	-0.394598395	1.99E-10
ost4	-0.390890905	0.003371165
cpxm1a	-0.390206631	1.73E-11
CABZ01058650.1	-0.389372166	1.84E-07
sec61a1	-0.388824303	4.09E-06
tmem263	-0.388815376	9.91E-06
alcama	-0.388656952	0.00123
akap12b	-0.386756464	0.188886752
angptl7	-0.38596441	0.0005
smox	-0.384815762	2.41E-10
six1b	-0.381732706	0.004558791
slc30a7	-0.381446692	2.94E-05
sox10	-0.38140689	0.031274584
tram1	-0.378168528	0.033621229
fzd5	-0.3770696	2.76E-13
ctsla	-0.376608019	8.94E-07
tmsb4x	-0.375106153	2.75E-14
pdia5	-0.373291532	0.000217975
calub	-0.373205549	4.46E-06
efemp2a	-0.372944319	0.00019716
gpx8	-0.37208827	2.62E-05
pdgfrl	-0.370194034	4.34E-06
tsc22d1	-0.367685212	3.46E-12
tmem45a	-0.367441647	6.21E-07
nck1a	-0.366870032	7.39E-05
foxf2b	-0.365736261	0.073325627
meis2a	-0.365655989	3.67E-13
pmp22b	-0.365468464	6.10E-07
fgfr2	-0.3639865	0.000245899
pbx1a	-0.363821774	0.292379345
grasp	-0.362662803	7.50E-05
efhd1	-0.362564025	0.369888811
gata3	-0.359856643	9.33E-06
rab2a	-0.359827972	1.93E-05
klf2b	-0.358195792	0.005686311
creb3l1	-0.355139636	1.75E-05
CR847566.1	-0.352181751	0.000887833
zgc:153867	-0.351347172	0.000992611
ucp2	-0.348923372	0.057079863
fscn1a	-0.347911646	0.013243679
tent5bb	-0.347645801	2.29E-06
nog1	-0.347360817	0.000305091
chac1	-0.344679298	0.032622016
meox1	-0.344625332	0.014156
mxra8b	-0.344463641	0.442457104
agtr2	-0.344446013	3.31E-07
sec61a1l	-0.344371272	0.28874998
eya2	-0.342686974	0.00563405
rspo3	-0.3423355	0.009105539
aebp1	-0.34082814	2.76E-10
tpm4a	-0.339499682	0.039907039
loxl3b	-0.338122463	2.73E-08
kdelr3	-0.338022077	2.64E-08
zgc:92606	-0.337688795	0.000119503
tmed2	-0.337251961	9.65E-07
mmp14a	-0.336066323	8.31E-05
eef1da	-0.335493348	0.000365534
sdf4	-0.334620681	0.00080679
otpa	-0.33233887	8.45E-23
tmed9	-0.33128314	0.002545214
tnfsf10	-0.331138227	0.512358678
serf2	-0.33071689	1.40E-11
mpped2a	-0.329726059	1.98E-05
copa	-0.327117534	0.00056363
gstt1a	-0.326634539	0.032954757
ikbip	-0.324973227	0.002082519
aff3	-0.324664196	5.07E-10
smco4	-0.323783896	0.000449149
atox1	-0.323219875	7.47E-05
CR381618.1	-0.322413274	2.98E-09
her9	-0.322168564	7.56E-11
txndc5	-0.320755387	0.031237521
krtcap2	-0.319704125	0.001272263
wwp2	-0.318965107	2.22E-42
s100v2	-0.317776476	0.033077689
cdo1	-0.313493957	0.007271748
cd81a	-0.311776457	2.33E-06
lhfpl6	-0.310646984	0.127746219
cd164	-0.310546289	0.00522752
gfra1a	-0.310273878	6.74E-06
dad1	-0.309783116	1.81E-05
marcksl1a	-0.309773952	0.000564
si:ch211-286o17.1	-0.307494727	4.68E-11
nt5dc2	-0.307136711	0.004278061
wnt11r	-0.306568885	3.65E-26
gmppb	-0.304783935	0.000118456
pcolce2a	-0.304658963	4.19E-08
robo3	-0.303417613	0.000401546
adam8a	-0.302958052	9.89E-06
cyp2ad3	-0.302236805	0.286706209
CABZ01080702.1	-0.301505043	0.177246428
gstt1b	-0.301143502	0.02246995
anxa4	-0.301122805	0.004106501
twist1a	-0.300734212	0.000356
gnai2a	-0.300698342	0.276920369
tuba8l3	-0.300658461	0.00671
arcn1b	-0.299804819	0.003747549
cebpd	-0.299679121	0.270809262
tmem178b	-0.299310209	0.000623995
phldb2b	-0.299227301	0.532927705
dkk3b	-0.298004153	0.000593298
rab1ab	-0.297384736	0.139114368
creb3l2	-0.297136173	1.56E-05
ephb3a	-0.297108785	0.000221109
si:ch211-152c2.3	-0.295466197	0.002472416
anxa13	-0.294744632	0.000405828
pmp22a	-0.293859744	0.199932989
colec12	-0.292697599	0.0345
itga10	-0.290684294	0.004600789
gale	-0.285614205	0.120996505
map1lc3b	-0.283079103	0.089054672
gadd45bb	-0.281129056	0.003498969
tmco1	-0.280639363	0.006052406
copb1	-0.279832601	0.002468628
cdc42	-0.279800329	6.78E-17
zgc:113208	-0.27979666	5.93E-11
slc39a7	-0.278824483	0.963029081
si:ch73-281n10.2	-0.27835608	5.73E-05
tpt1	-0.278271988	6.63E-03
prdx4	-0.278140041	0.043031938
rap1b	-0.27811953	1.51E-09
pmm2	-0.27745024	6.65E-08
rrbp1a	-0.277125026	0.148059883
ctsk	-0.276870321	0.0000315
sox4a.1	-0.276574039	7.83E-09
zgc:110339	-0.276394117	3.35E-22
tia1l	-0.276212934	6.79E-05
snx4	-0.276145725	2.17E-16
mcfd2	-0.276039513	0.090344137
calr3b	-0.275315122	0.000515273
fosb	-0.274824989	0.011218516
derl2	-0.274521708	0.087489671
cndp2	-0.274512802	4.29E-19
atf4b	-0.274084652	4.03E-10
gorasp2	-0.273634227	0.013710746
smarcb1b	-0.273355903	7.43E-08
spcs3	-0.272805324	1.81E-09
zgc:194246	-0.272401322	1.54E-11
sec22bb	-0.272005293	1.57E-12
serpinh2	-0.271341978	6.14E-07
gosr2	-0.270977465	0.00080475
pcdh18b	-0.270210736	5.67E-46
arl1	-0.269839926	7.63E-06
ufm1	-0.269700561	0.013499487
cyp1c1	-0.269631969	4.65E-29
psmb2	-0.269374814	3.72E-11
map1lc3a	-0.269323479	0.006441596
smim7	-0.268541235	0.025500232
twist2	-0.268007197	4.85E-24
dusp2	-0.26762733	0.054309547
p3h3	-0.26730091	0.008417466
sept8a	-0.267046314	6.76E-09
lhfpl2a	-0.267029397	2.20E-12
ptmab	-0.266827891	7.50E-21
hvcn1	-0.266735894	0.001178897
lhfpl2b	-0.266285068	5.28E-07
actb1	-0.26583426	1.99E-30
fxyd6l	-0.265555763	1.32E-09
selenof	-0.265393586	0.011166687
anxa11b	-0.264783463	4.90E-11
atp6v0e1	-0.264517313	3.89E-07
sar1b	-0.264433828	1.55E-45
elof1	-0.26393625	1.53E-11
ift20	-0.26393049	0.000117527
krt8	-0.263584327	5.66E-31
fgfr3	-0.262937442	5.39E-44
rhoac	-0.262814615	6.32E-07
tiparp	-0.262525848	0.021913487
ccdc32	-0.262012198	7.47E-05
sec22ba	-0.261729293	0.026075825
dnajc1	-0.26130649	1.93E-06
cd248a	-0.261188369	0.598690639
tm9sf2	-0.260665013	3.55E-06
mafba	-0.260620658	0.013661016
dpm3	-0.259947656	1.47E-05
si:ch73-86n18.1	-0.25985172	5.42E-34
mgst3b	-0.259654725	1.67E-10
scfd1	-0.258777815	1.38E-08
rnd3a	-0.258061841	9.19E-08
sema3fa	-0.256709756	0.463318874
neo1a	-0.256535174	6.40E-06
si:dkey-7j14.6	-0.256422304	7.29E-27
zic2a	-0.256186982	0.734051114
calm2a	-0.25542777	1.72E-08
h1fx	-0.255310814	3.87E-27
bet1l	-0.25453829	3.75E-12
sat1a.2	-0.254271447	1.22E-25
stk17al	-0.253463233	1.88E-05
pik3r3a	-0.253434022	0.000114783
slc35b4	-0.253407243	6.01E-07
zgc:162944	-0.252592752	0.000415248
sept7a	-0.252207444	2.50E-12
btg1	-0.25134056	3.07E-27
eci1	-0.251161478	9.85E-07
cops9	-0.251072419	8.72E-28
cyb5a	-0.250772966	9.47E-09
fam3c	-0.25020357	0.00485575
eif1b	0.281503117	5.67E-22
rab5if	0.282154443	0.000172744
pfn2l	0.282332176	1.66E-16
cirbpb	0.284253583	2.58E-29
aldh9a1a.1	0.28493158	8.60E-13
sh3pxd2b	0.28609324	3.53E-23
hmgn6	0.287777551	2.15E-26
msna	0.289040004	9.63E-16
eef1b2	0.289901448	3.36E-34
tmem165	0.290514336	1.53E-09
clint1a	0.290595952	4.40E-07
tmem167a	0.291544536	1.20E-06
cmpk	0.292767008	0.000931395
wls	0.301237303	4.60E-18
prkab1b	0.302580431	2.20E-07
lman2	0.306543918	1.33E-13
pycr1b	0.308744458	1.26E-09
ubc	0.308829249	1.04E-33
cnpy4	0.310703454	3.86E-15
eif5a	0.312179908	6.51E-48
sgms1	0.313705673	7.74E-28
efnb2a	0.314613319	4.73E-07
cd276	0.315625819	1.09E-28
spry2	0.316142575	4.86E-19
selenon	0.316775616	3.08E-15
erp44	0.3169064	1.39E-09
tmed5	0.317620402	6.29E-15
pdia4	0.318444599	4.05E-11
rras	0.319240944	1.30E-15
id1	0.321017102	5.16E-14
lsp1	0.32206034	1.77E-12
ifi30	0.322760735	3.08E-14
gng12a	0.323080715	1.17E-20
ufc1	0.324084342	0.005658352
ppiaa	0.324117328	1.69E-50
emd	0.325330675	1.67E-14
si:dkey-6n21.12	0.326088773	3.82E-17
mif	0.328226304	2.54E-14
tmem39a	0.328401427	6.27E-17
cd151l	0.328835589	1.15E-08
irf2bpl	0.33006573	1.54E-17
ube2e3	0.330251016	8.32E-14
tmed10	0.336319516	6.05E-13
kdm6bb	0.336851104	2.48E-12
copg2	0.336857604	2.02E-09
mydgf	0.337282664	5.22E-14
copb2	0.337722989	5.73E-10
zgc:66433	0.338730241	3.69E-32
pomp	0.338975932	5.52E-25
si:dkey-28b4.7	0.342362443	3.64E-19
ugp2b	0.344511676	1.71E-14
si:ch211-11k18.4	0.344801625	4.01E-15
napab	0.346257018	3.44E-17
vdac3	0.348674844	2.07E-24
praf2	0.348914574	1.77E-19
bzw1b	0.348986328	1.60E-11
ybx1	0.350568723	2.29E-78
tmem119b	0.352418155	1.82E-58
bmpr1ba	0.353193112	1.32E-38
hif1al	0.354242596	1.04E-13
kirrel1a	0.35675043	5.66E-26
magt1	0.358621199	1.03E-17
sec11a	0.360551424	7.59E-16
irf2bp2b	0.362159535	5.17E-14
aip	0.363756762	6.22E-16
sult6b1	0.36510138	3.33E-31
sri	0.365626164	6.07E-19
dynll1	0.367668461	8.81E-22
ywhabb	0.372688385	2.69E-36
dnajb11	0.375102432	5.50E-13
cpne1	0.376072985	1.02E-15
cbx1b	0.376450631	2.59E-19
calm3b	0.376977745	5.34E-27
ociad2	0.378312318	3.47E-63
rpe65b	0.378368819	1.57E-62
rab13	0.379771712	6.81E-26
tfg	0.381016941	1.63E-14
snd1	0.382690872	3.84E-17
pcdh18a	0.383236965	4.32E-34
fam133b	0.384819749	2.27E-16
rab6a	0.385217814	8.87E-15
prrc1	0.386380448	8.09E-19
eif4a1b	0.38693977	7.47E-28
golt1bb	0.390311298	7.93E-19
fzd2	0.39459856	2.17E-23
cdca4	0.398993591	2.93E-25
fzd8a	0.401451515	6.62E-23
cnn3a	0.408995567	1.30E-17
meis1a	0.410600048	1.05E-06
h2afy2	0.411825589	1.16E-30
hm13	0.412401683	6.09E-19
flrt3	0.413601123	9.86E-26
sec13	0.413913153	1.45E-15
tuba8l	0.414404991	0.001428481
cdkn1bb	0.414522059	3.66E-16
calr3a	0.421634236	1.93E-24
ctnnb1	0.423009917	1.44E-39
inka1a	0.423383477	5.47E-36
plscr3b	0.427979484	2.42E-22
arcn1a	0.430308408	2.48E-22
pgrmc1	0.432758838	9.06E-29
boc	0.435026365	4.61E-16
zgc:77086	0.435118841	2.71E-27
adh5	0.437385826	3.47E-30
qkia	0.437891924	5.97E-37
hmgb1a	0.441878032	4.41E-46
hmgn7	0.446114162	4.19E-48
fmoda	0.447523967	6.90E-98
ddost	0.4494258	2.49E-22
atf3	0.44970998	3.44E-05
tspan7	0.453383546	5.67E-38
zgc:109934	0.459378344	5.34E-07
tcf7l1a	0.463210634	8.72E-32
metrnla	0.464229224	1.04E-26
10-Sep	0.46653581	2.26E-33
slc43a1a	0.467729339	5.74E-30
enpp6	0.469400209	1.46E-23
net1	0.474697798	5.75E-12
ednraa	0.476415642	9.32E-75
pdgfra	0.478549805	7.26E-65
yap1	0.478619174	6.21E-30
fgfrl1a	0.48090804	2.77E-50
rbp5	0.485451044	3.35E-46
si:ch211-156j16.1	0.493541308	2.18E-22
arpc1b	0.499667692	3.69E-63
phlda3	0.501448843	1.56E-11
rpn1	0.516311176	2.37E-31
ppfibp1a	0.544465162	8.33E-10
manf	0.544823017	1.35E-27
ndnf	0.566416222	1.12E-10
h3f3c	0.597089064	2.21E-86
ptbp1b	0.618487222	2.56E-56
serpinf1	0.624883566	5.28E-56
pdia6	0.650261688	8.26E-49
hsp90b1	0.652005459	7.02E-43
twist1b	0.658660646	1.45E-89
pdia3	0.680686644	8.91E-77
fzd7a	0.6959938	1.53E-42
hspa5	0.906698089	3.53E-80
fzd3b	1.077243	7.79E-24
her6	1.110382696	5.32E-92
hapln1a	1.167740541	2.04E-12
foxc1b	1.362305455	5.28E-52
fzd7b	1.713695815	8.09E-08
dkk2	1.956056652	8.57E-12
wif1	1.97819563	6.90E-06
axin2	2.117695043	7.40E-58
wnt11b	2.35614381	1.45E-23
nkd2a	2.801158656	1.11E-50
nkd1	2.813524689	1.36E-33
wnt7b	3.132576843	8.19E-55
gpc1a	3.307428525	3.67E-31
sfrp1a	3.697106574	7.24E-24
sfrp2	-1.395331793	8.72E-17
