# Supplementary material for: Predicting Modifiers of Genotype-Phenotype Correlations in Craniofacial Development
Source: Int J Mol Sci. 2023 Jan 8;24(2):1222. doi: 10.3390/ijms24021222 (PMC9864425; doi:10.3390/ijms24021222)
Supplement: Supplementary file 1 [file ijms-24-01222-s001.zip › LincsInputGenes.xlsx]

## Sheet: Upregulated
col2a1a
cnmd
ccl25b
col9a3
ppp3r2
matn4
col9a1a
col9a2
col11a1a
cthrc1a
camk2a
prkcb
wnt2b
wnt1
mapk10
fibina
wnt10b
prkacb
wnt5b
col11a2
wnt9a
serpinh1b
cd82a
col2a1b
cyp26c1
tnn
zgc:162730
wfdc2
tgfbi
mmp2
ctgfa
sparc
postnb
cxcl12a
btg2
socs3a
fxyd1
foxp4
snai1a
si:ch73-335l21.4
col5a1
prrx1a
junba
fgfbp2b
ppib
ier2a
otos
prss35
cpn1.1
fstl1b

## Sheet: Downregulated
qkia
hmgb1a
hmgn7
fmoda
ddost
atf3
tspan7
zgc:109934
tcf7l1a
metrnla
2022-09-10
slc43a1a
enpp6
net1
ednraa
pdgfra
yap1
fgfrl1a
rbp5
si:ch211-156j16.1
arpc1b
phlda3
rpn1
ppfibp1a
manf
ndnf
h3f3c
ptbp1b
serpinf1
pdia6
hsp90b1
twist1b
pdia3
fzd7a
hspa5
fzd3b
her6
hapln1a
foxc1b
fzd7b
dkk2
wif1
axin2
wnt11b
nkd2a
nkd1
wnt7b
gpc1a
sfrp1a
sfrp2
